# Supplementary material
Source: publisher figshare collection journal article supplement (https://tandf.figshare.com/ndownloader/files/16095281)
Supplement: Supplementary file 1 [file 16095281]

Supplemental material

Table S1. Comparison of the transport parameters obtained in all investigated processes after 120 min of DD

| Process conditions | | | *U*·106, m/s | *J*acid, mol/m2min | *E*DD,  % | *R*total,  % |
| --- | --- | --- | --- | --- | --- | --- |
| Flow rates, dm3/min | *V*f/*V*d | *A*,  m2 |
| PLS1 | | | | | | |
| *Q*f=*Q*d=0.015 | 1.0 | 0.015 | 1.25 | 0.17 | 38.9 | 97.5 |
| 2.0 | 1.20 | 0.18 | 28.8 | 97.6 |
| *Q*f=*Q*d=0.03 | 2.0 | 0.82 | 0.12 | 33.2 | 96.0 |
| *Q*f=*Q*d=0.06 | 2.0 | 0.47 | 0.15 | 36.3 | 90.4 |
| 2.0 **N** | 0.43 | 0.20 | - | 92.7 |
| *Q*f=0.03 *Q*d=0.06 | 2.0 | 0.56 | 0.11 | 40.6 | 82.5 |
| *Q*f=0.06 *Q*d=0.03 | 2.0 | 0.32 | 0.14 | 44.9 | 80.8 |
| PLS2 | | | | | | |
| *Q*f=*Q*d=0.015 | 1.0 | 0.015 | 0.86 | 0.065 | 37.7 | 97.2 |
| 2.0 | 1.24 | 0.30 | 29.9 | 97.9 |
| *Q*f=*Q*d=0.03 | 2.0 | 3.15 | 0.20 | 31.1 | 96.2 |
| *Q*f=*Q*d=0.06 | 2.0 | 1.16 | 0.13 | 31.2 | 94.7 |
| 2.0 **N** | - | 0.11 | - | 96.5 |
| 2.0 **FD** | 0.75 | 0.24 | 16.8 | 97.4 |
| *Q*f=0.03 *Q*d=0.06 | 2.0 |  | 1.5 | 0.063 | 43.1 | 97.5 |
| *Q*f=0.06 *Q*d=0.03 | 2.0 | 1.08 | 0.075 | 37.7 | 97.7 |
| *Q*f=*Q*d=0.03 | 2.0 | 0.03 | 0.93 | 0.10 | 43.1 | 97.5 |
| *Q*f=*Q*d=0.04 | 2.0 | 0.73 | 0.13 | 37.7 | 97.7 |

N – with neutralization of the dialysate, and increasing volume of the dialysate

FD – with replacement of the dialysate after 45 min of DD with fresh water
